# Supplementary material
Source: PubMed Central journal article supplement (PMC6234840)

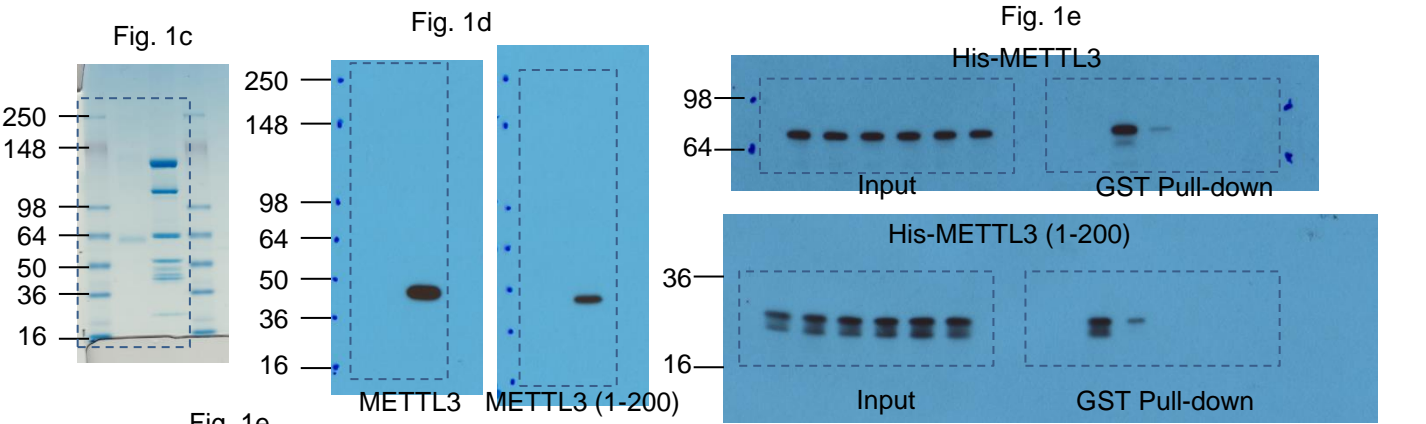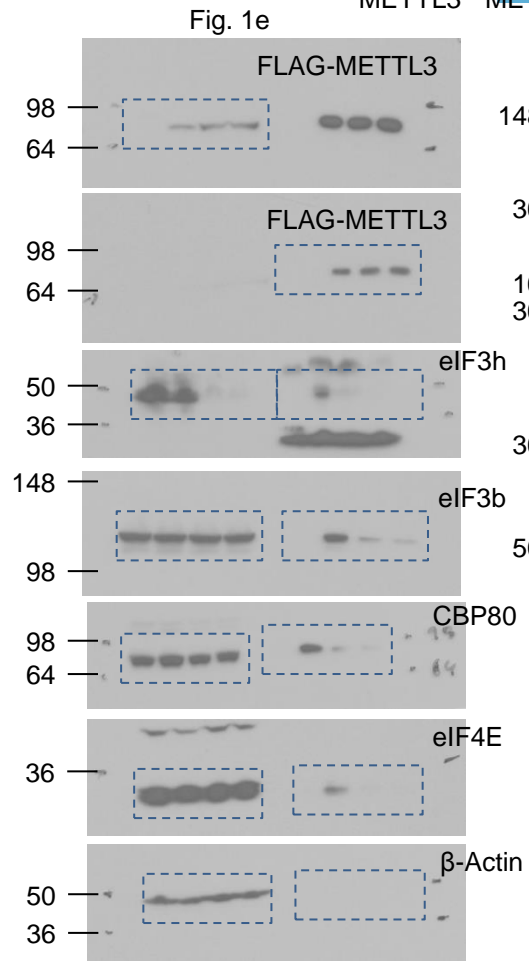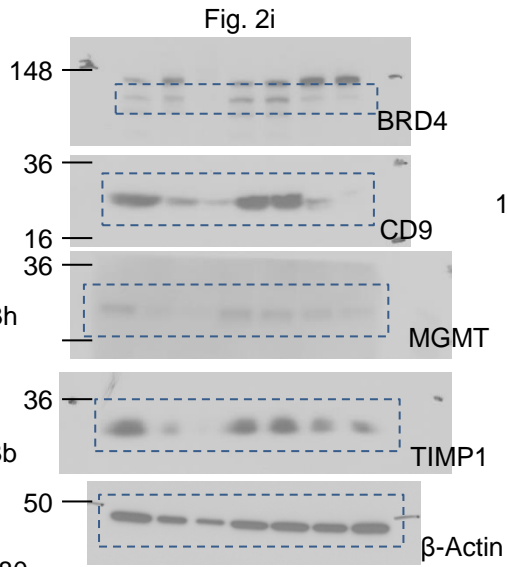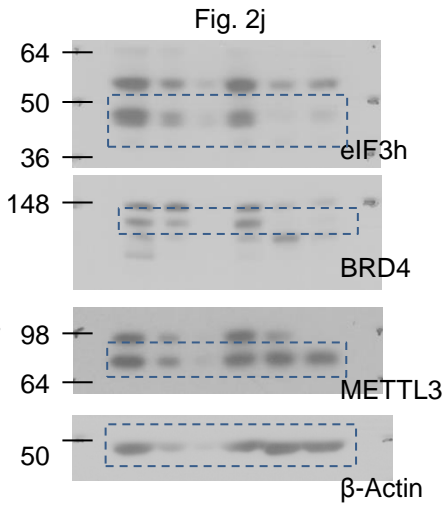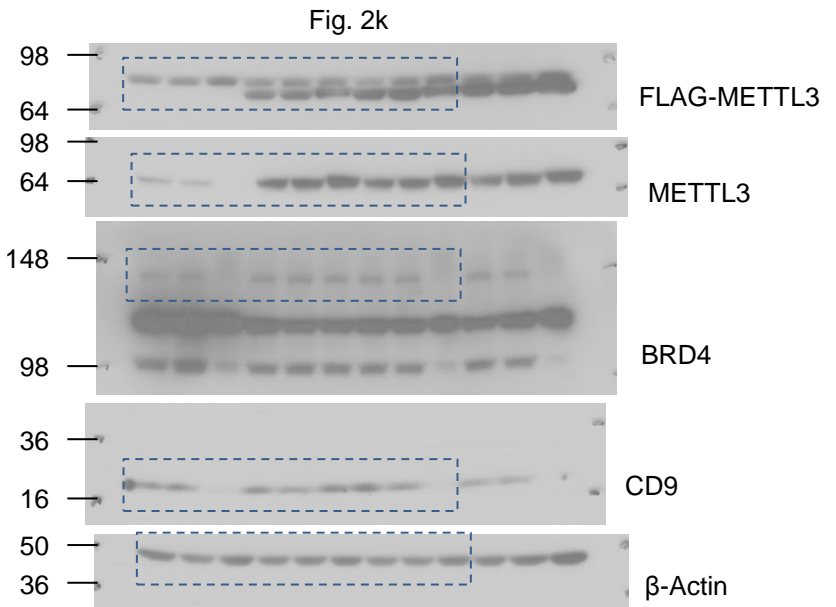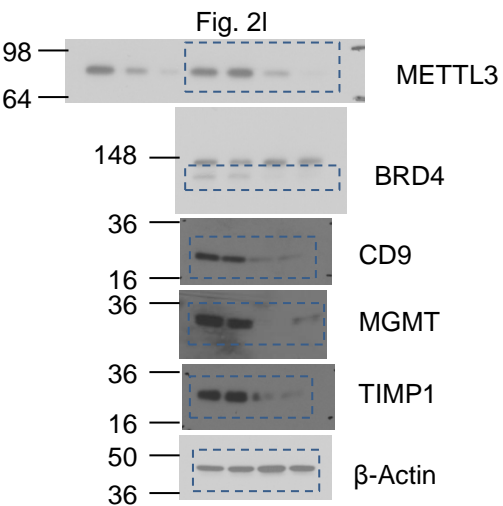

Fig. 3a

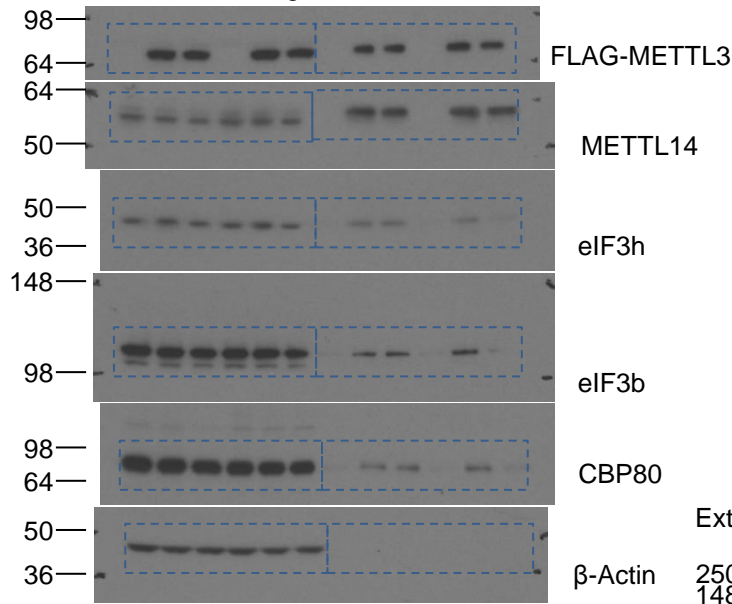

Fig. 3c

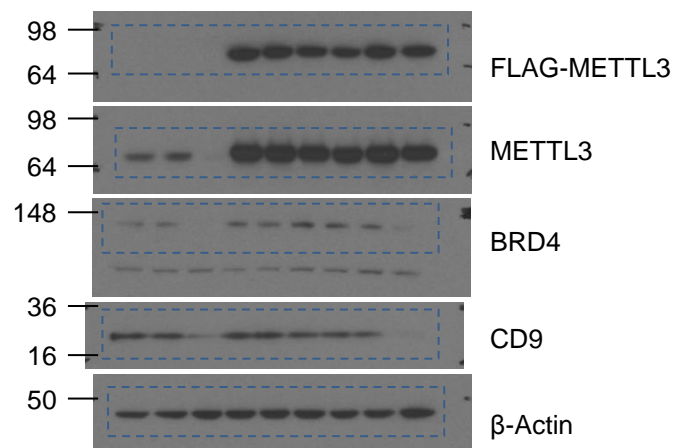

Extended Data Fig. 1b

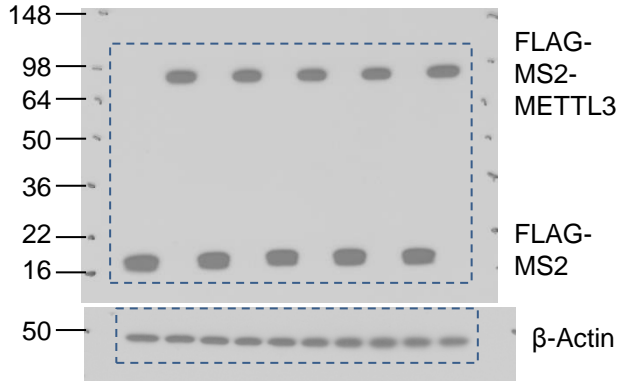

Extended Data Fig. 1e

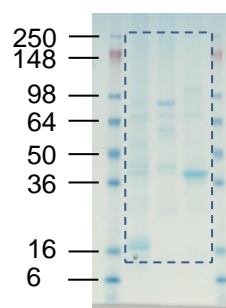

Extended Data Fig. 2b

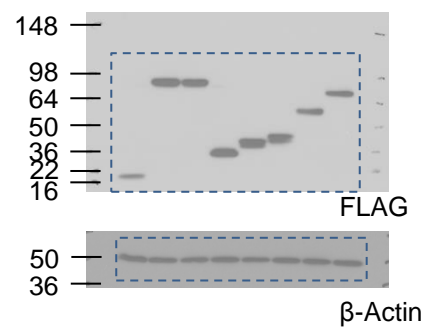

Extended Data Fig. 1f

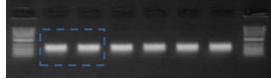

Extended Data Fig. 3b

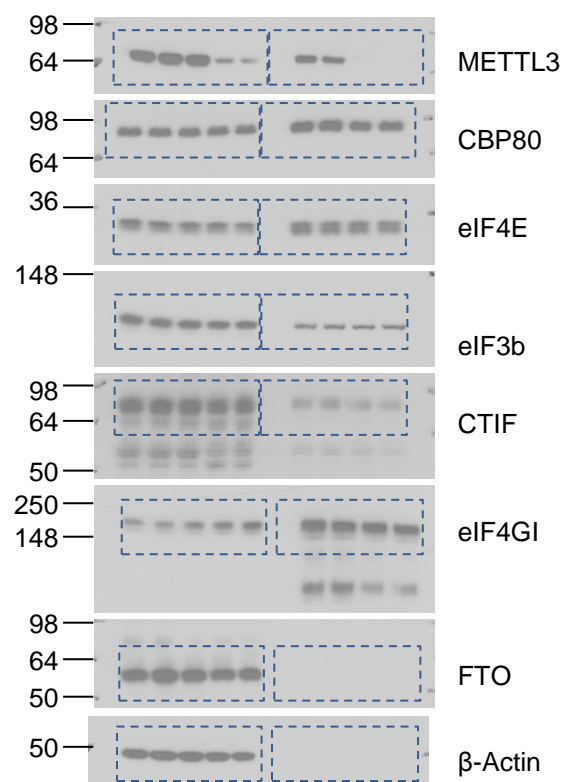

Extended Data Fig. 3a

Input m7GTP Pull-down

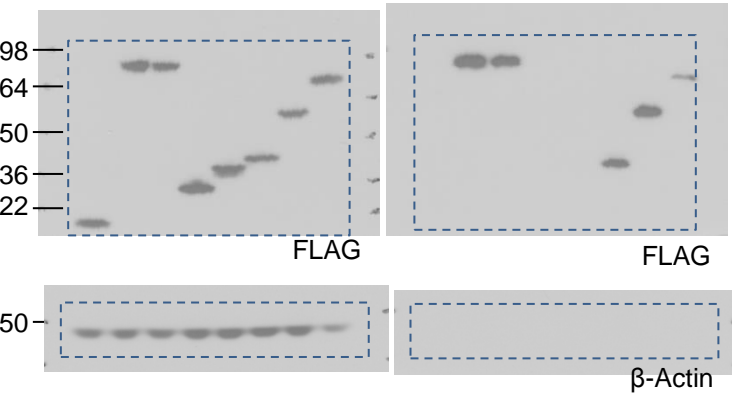

Extended Data Fig. 3c

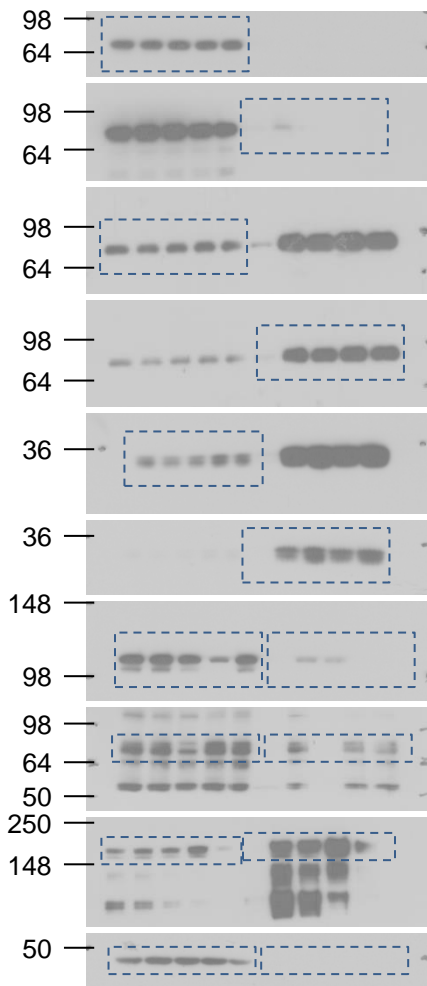

Extended Data Fig. 3d

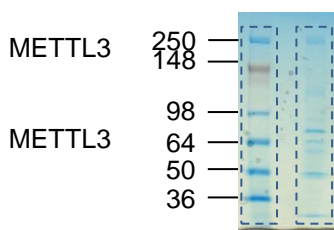

Extended Data Fig. 4e

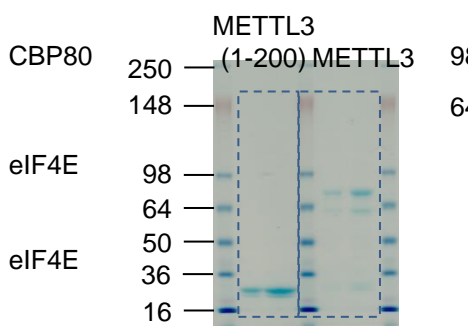

Extended Data Fig. 4f

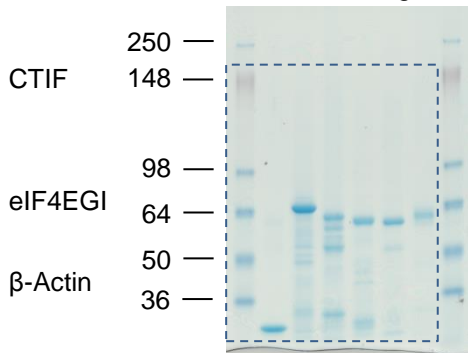

Extended Data Fig. 4g

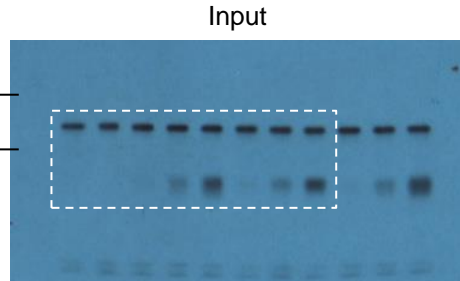

GST Pull-down

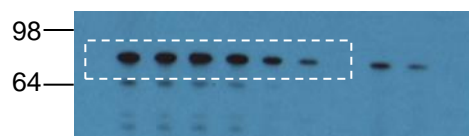

Extended Data Fig. 4i

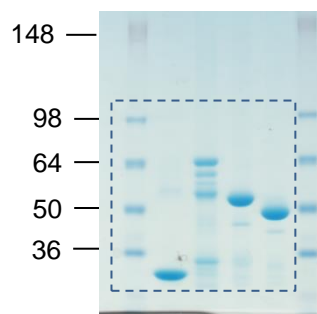

Extended Data Fig. 4j

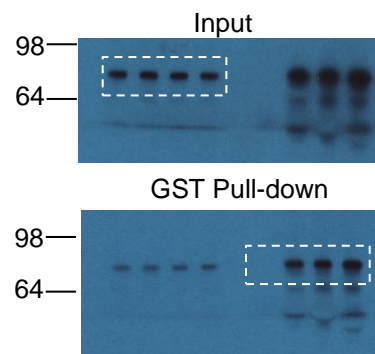

Extended Data Fig. 4k

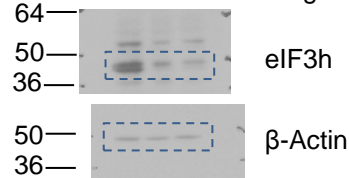

Extended Data Fig. 6c

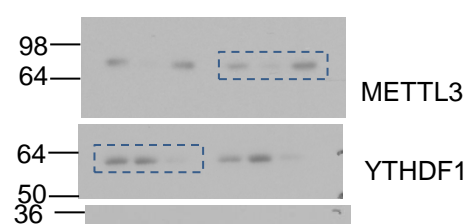

Extended Data Fig. 5a

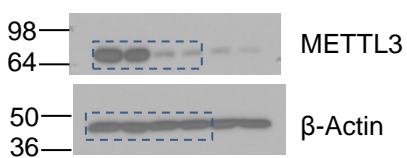

Extended Data Fig. 6a

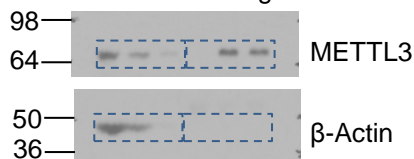

Extended Data Fig. 7d

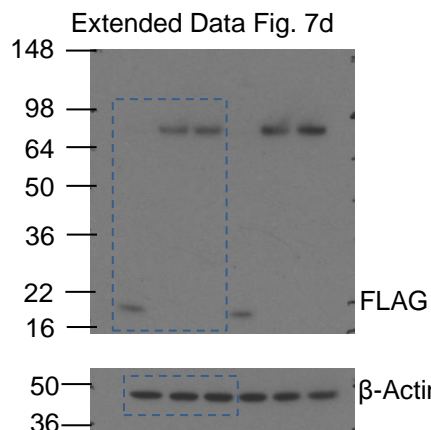

Extended Data Fig. 7f

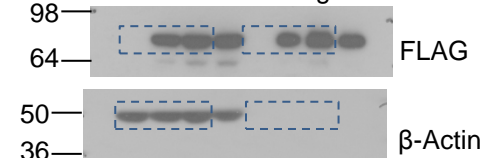

Extended Data Fig. 8b

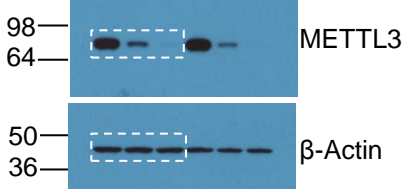

Extended Data Fig. 8e

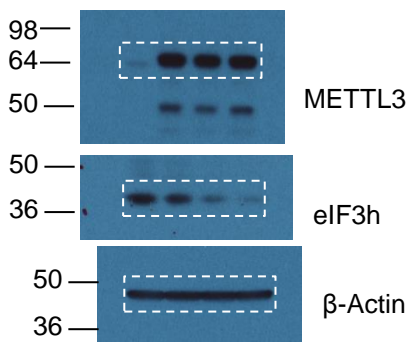

Extended Data Fig. 8f

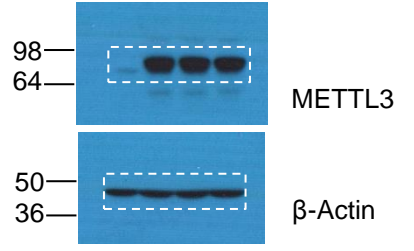

Extended Data Fig. 8g

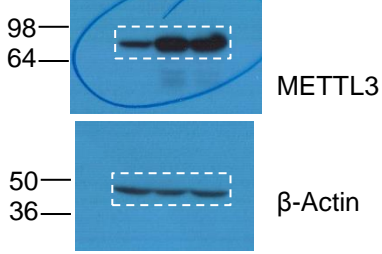

Extended Data Fig. 8h

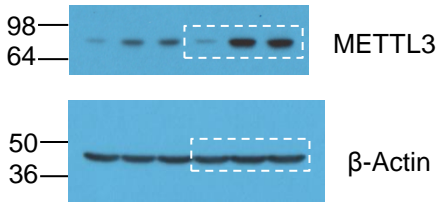

Supplement: NIHMS1503937-supplement-5.pdf [file NIHMS1503937-supplement-5.pdf]
